# Supplementary material for: Iron arsenate frameworks
Source: Royal Society of Chemistry journal article supplement (doi:10.1039/b702847d), 2007-01-01
Supplement: b702847d.pdf [file b702847d.pdf]

Table S1 - Key hydrogen bonding interactions in iron arsenates (1) - (6)

| D-H...A                                                                                                                                              | d(D-H) / Å | d(H...A) / Å | d(D-A) / Å | ∠(DHA) / ° |
|------------------------------------------------------------------------------------------------------------------------------------------------------|------------|--------------|------------|------------|
| <b>(1)</b>                                                                                                                                           |            |              |            |            |
| O(1W)-H(1W)...O(2) <sup>i</sup>                                                                                                                      | 0.84(2)    | 2.20(3)      | 2.920(4)   | 145(4)     |
| O(1W)-H(2W)...O(4) <sup>ii</sup>                                                                                                                     | 0.84(2)    | 2.65(4)      | 3.120(4)   | 117(3)     |
| O(1W)-H(2W)...O(7) <sup>ii</sup>                                                                                                                     | 0.84(2)    | 1.94(2)      | 2.741(4)   | 160(4)     |
| O(2W)-H(3W)...O(7) <sup>iii</sup>                                                                                                                    | 0.85(2)    | 2.55(4)      | 3.043(4)   | 118(4)     |
| O(2W)-H(4W)...O(5)                                                                                                                                   | 0.85(2)    | 2.16(3)      | 2.935(4)   | 151(4)     |
| O(2W)-H(4W)...O(6)                                                                                                                                   | 0.85(2)    | 2.57(3)      | 3.204(4)   | 132(3)     |
| Symmetry codes: i) x+1, y, z ii) -x+1, -y, -z iii) x-1/2, -y+1/2, z+1/2                                                                              |            |              |            |            |
| <b>(2)</b>                                                                                                                                           |            |              |            |            |
| N(1)-H(1A)...O(8) <sup>i</sup>                                                                                                                       | 0.91       | 2.02         | 2.889(4)   | 158        |
| N(1)-H(1B)...O(1W) <sup>ii</sup>                                                                                                                     | 0.91       | 1.99         | 2.816(4)   | 151        |
| N(1)-H(1B)...O(1W) <sup>iii</sup>                                                                                                                    | 0.91       | 2.32         | 2.913(4)   | 123        |
| N(1)-H(1C)...O(6) <sup>iv</sup>                                                                                                                      | 0.91       | 2.05         | 2.956(4)   | 171        |
| O(1W)-H(1)...O(4)                                                                                                                                    | 0.88(1)    | 2.18(2)      | 3.058(4)   | 170(4)     |
| O(1W)-H(2)...O(10) <sup>iv</sup>                                                                                                                     | 0.87(1)    | 2.20(3)      | 2.962(4)   | 147(4)     |
| O(1W)-H(2)...O(2) <sup>iv</sup>                                                                                                                      | 0.87(1)    | 2.46(4)      | 3.100(4)   | 131(4)     |
| O(11)-H(11)...N(1) <sup>v</sup>                                                                                                                      | 0.84       | 2.63         | 3.456(4)   | 168        |
| O(15)-H(15)...O(7) <sup>vi</sup>                                                                                                                     | 0.84       | 2.13         | 2.718(3)   | 127        |
| O(15)-H(15)...O(6) <sup>iii</sup>                                                                                                                    | 0.84       | 2.38         | 3.040(3)   | 136        |
| Symmetry codes: i) x+1, y, z ii) -x+1, -y, -z iii) x-1/2, -y+1/2, z+1/2                                                                              |            |              |            |            |
| <b>(3)</b>                                                                                                                                           |            |              |            |            |
| O(19)-H(19)...O(21) <sup>i</sup>                                                                                                                     | 0.84       | 1.88         | 2.651(8)   | 152        |
| O(20)-H(20)...O(24)                                                                                                                                  | 0.84       | 1.79         | 2.626(8)   | 174        |
| O(21)-H(21)...O(12)                                                                                                                                  | 0.84       | 1.93         | 2.727(8)   | 159        |
| O(22)-H(22)...O(20) <sup>iii</sup>                                                                                                                   | 0.84       | 1.99         | 2.605(8)   | 130        |
| O(23)-H(23)...O(12)                                                                                                                                  | 0.84       | 1.99         | 2.795(8)   | 159        |
| O(24)-H(24)...O(2) <sup>ii</sup>                                                                                                                     | 0.84       | 1.89         | 2.690(8)   | 160        |
| N(1)-H(1A)...O(8) <sup>i</sup>                                                                                                                       | 0.92       | 1.94         | 2.85(1)    | 166        |
| N(1)-H(1A)...O(11) <sup>ii</sup>                                                                                                                     | 0.92       | 2.34         | 2.85(1)    | 115        |
| N(1)-H(1B)...O(2W) <sup>ii</sup>                                                                                                                     | 0.92       | 1.95         | 2.84(1)    | 160        |
| N(2)-H(2A)...O(1W)                                                                                                                                   | 0.92       | 1.93         | 2.84(1)    | 167        |
| N(2)-H(2B)...O(19) <sup>iv</sup>                                                                                                                     | 0.92       | 1.78         | 2.69(1)    | 166        |
| O(1W)-H(1W)...O(24) <sup>v</sup>                                                                                                                     | 0.83(2)    | 1.97(4)      | 2.79(1)    | 165(11)    |
| O(1W)-H(2W)...O(2) <sup>i</sup>                                                                                                                      | 0.84(2)    | 2.02(3)      | 2.78(1)    | 151(3)     |
| O(2W)-H(3W)...O(12) <sup>vi</sup>                                                                                                                    | 0.85(2)    | 2.25(9)      | 2.88(1)    | 131(10)    |
| O(2W)-H(4W)...O(21) <sup>i</sup>                                                                                                                     | 0.85(2)    | 2.27(3)      | 3.103(9)   | 166(8)     |
| Symmetry codes i) x+1, y, z ii) x+1/2, -y+1/2, z-1/2 iii) x-1/2, -y+1/2, z+1/2 iv) -x+3/2, y+1/2, -z+1/2 v) -x+1/2, y+1/2, -z+1/2 vi) -x+1, -y, -z+1 |            |              |            |            |
| <b>(4)</b>                                                                                                                                           |            |              |            |            |
| N(1)-H(1A)...O(10) <sup>i</sup>                                                                                                                      | 0.87(7)    | 1.93(7)      | 2.792(6)   | 175(6)     |
| N(1)-H(1B)...O(8) <sup>ii</sup>                                                                                                                      | 1.00(8)    | 1.91(8)      | 2.837(5)   | 154(6)     |
| Symmetry codes: i) -x, -y+1, -z ii) x-1, y, z                                                                                                        |            |              |            |            |
| <b>(5)</b>                                                                                                                                           |            |              |            |            |
| O(8)-H(8)...N(1) <sup>i</sup>                                                                                                                        | 0.84       | 2.65         | 3.22(2)    | 127        |
| O(11)-H(11)...O(13) <sup>ii</sup>                                                                                                                    | 0.84       | 1.66         | 2.44(2)    | 152        |
| O(13)-H(13)...O(9) <sup>iii</sup>                                                                                                                    | 0.84       | 2.30         | 3.122(9)   | 168        |
| O(16)-H(16)...O(6)                                                                                                                                   | 0.84       | 2.15         | 2.97(1)    | 167        |
| N(1)-H(1)...O(17)                                                                                                                                    | 0.93(1)    | 2.000(6)     | 2.79(2)    | 143(1)     |
| N(1)-H(1)...O(4)                                                                                                                                     | 0.93(1)    | 2.425(6)     | 3.08(2)    | 128(2)     |
| N(2)-H(2)...O(4)                                                                                                                                     | 0.92(2)    | 1.695(6)     | 2.56(2)    | 156(1)     |
| Symmetry codes i) -x, -y, -z ii) x, y-1, z iii) x, y+1, z                                                                                            |            |              |            |            |
| <b>(6)</b>                                                                                                                                           |            |              |            |            |
| O(5)-H(1)...O(2) <sup>i</sup>                                                                                                                        | 0.80(2)    | 2.16(3)      | 2.930(4)   | 161(5)     |
| O(5)-H(1)...O(3) <sup>i</sup>                                                                                                                        | 0.80(2)    | 2.54(5)      | 2.848(4)   | 105(4)     |
| Symmetry codes: i) x+1, y, z                                                                                                                         |            |              |            |            |
